# Supplementary material
Source: publisher figshare collection journal article supplement (https://acs.figshare.com/ndownloader/files/13533296)
Supplement: Supplementary file 1 [file 13533296]

# Supporting Information

Up-converting     $\text{LuVO}_4$ :     $\text{Nd}^{3+}/\text{Yb}^{3+}/\text{Er}^{3+}@ \text{SiO}_2@ \text{Cu}_2\text{S}$     Hollow  
Nanoplatfoms for Self-monitored Photothermal Ablation

Hao Suo, Xiaoqi Zhao, Zhiyu Zhang, Yanfang Wu and Chongfeng Guo\*

National Key Laboratory of Photoelectric Technology and Functional Materials (Culture Base) in Shaanxi Province, National Photoelectric Technology and Functional Materials & Application of Science and Technology International Cooperation Base, Institute of Photonics & Photon-Technology, Northwest University, Xi'an, 710069, China;

---

E-mail: [guocf@nwu.edu.cn](mailto:guocf@nwu.edu.cn) (Prof. Guo);

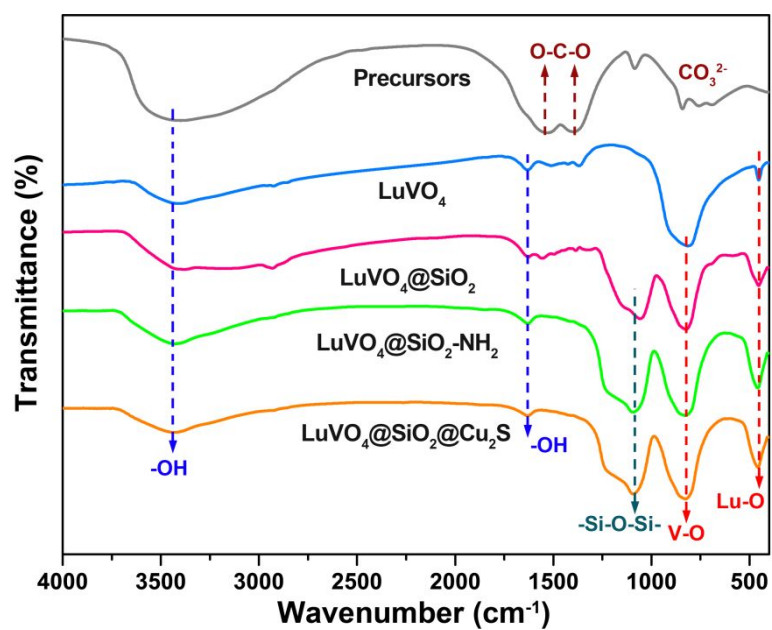

**Figure S1.** FT-IR spectra of precursors, LuVO<sub>4</sub>, LuVO<sub>4</sub>@SiO<sub>2</sub>, -NH<sub>2</sub> modified LuVO<sub>4</sub>@SiO<sub>2</sub> and LuVO<sub>4</sub>@SiO<sub>2</sub>@Cu<sub>2</sub>S nanoparticles.

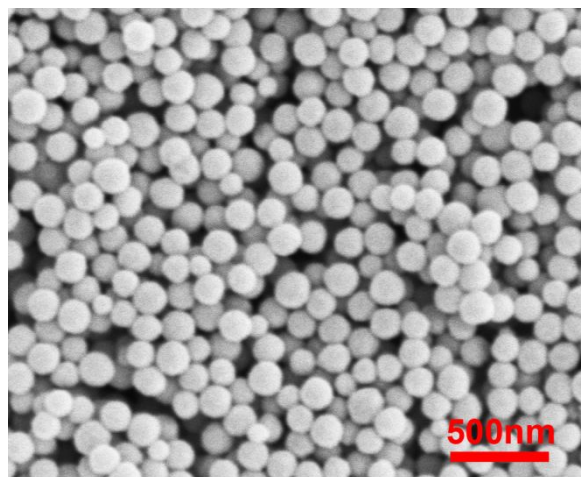

**Figure S2.** SEM image of spherical precursors.

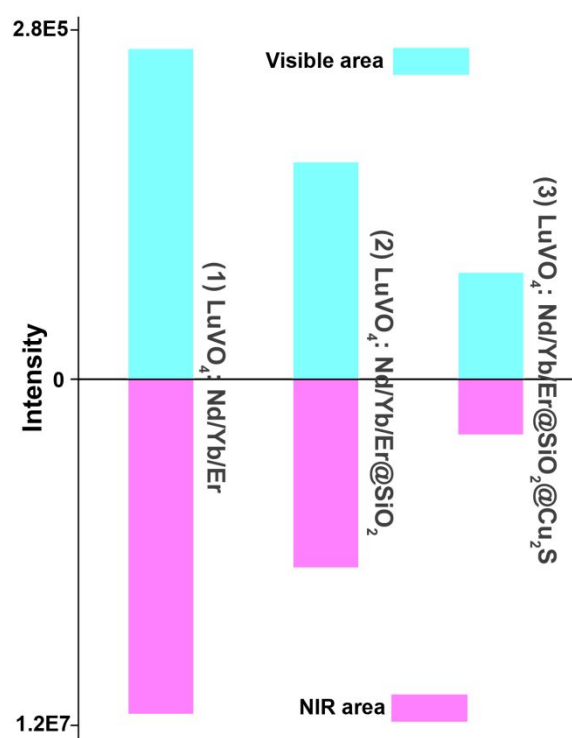

**Figure S3.** The integrated emission intensity in visible and NIR regions of  $\text{Nd}^{3+}/\text{Yb}^{3+}/\text{Er}^{3+}$  tri-doped (1)  $\text{LuVO}_4$ , (2)  $\text{LuVO}_4@ \text{SiO}_2$  and (3)  $\text{LuVO}_4@ \text{SiO}_2@ \text{Cu}_2\text{S}$  nanoparticles under 808 nm excitation.

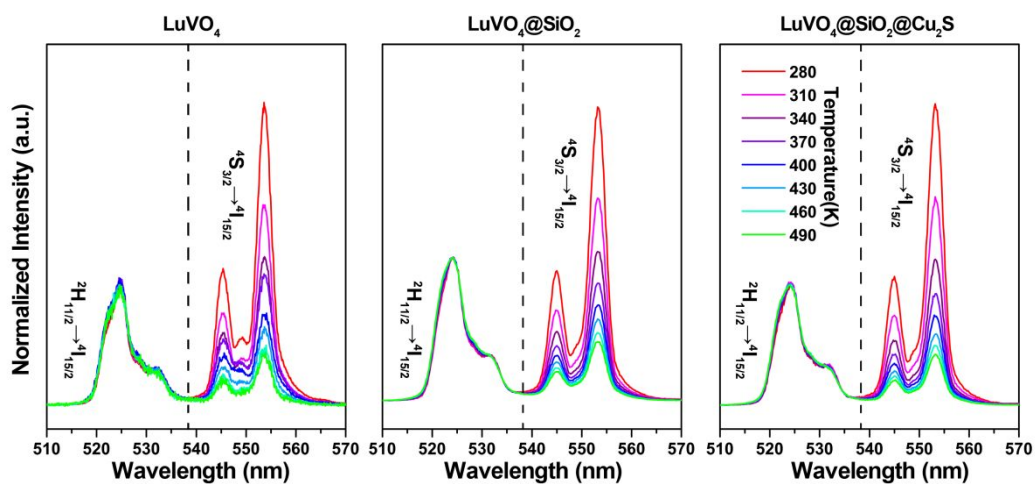

**Figure S4.** Temperature-dependent UC emission spectra of  $\text{Nd}^{3+}/\text{Yb}^{3+}/\text{Er}^{3+}$  tri-doped  $\text{LuVO}_4$ ,  $\text{LuVO}_4@\text{SiO}_2$  and  $\text{LuVO}_4@\text{SiO}_2@\text{Cu}_2\text{S}$  nanoparticles in range of 510-570 nm under the excitation of 808 nm laser (normalized at  ${}^2\text{H}_{11/2} \rightarrow {}^4\text{I}_{15/2}$ ).

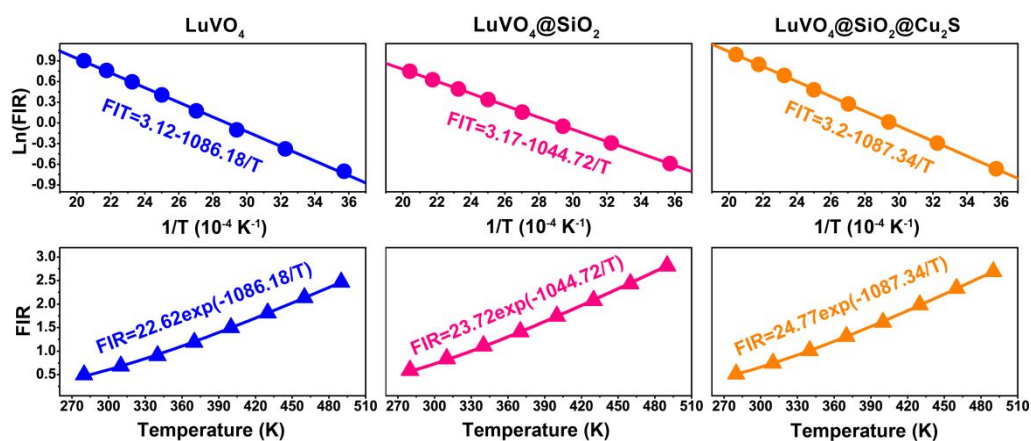

**Figure S5.** The plots of FIR values as a function of temperature in  $\text{Nd}^{3+}/\text{Yb}^{3+}/\text{Er}^{3+}$  tri-doped  $\text{LuVO}_4$ ,  $\text{LuVO}_4@\text{SiO}_2$  and  $\text{LuVO}_4@\text{SiO}_2@\text{Cu}_2\text{S}$  nanoparticles.

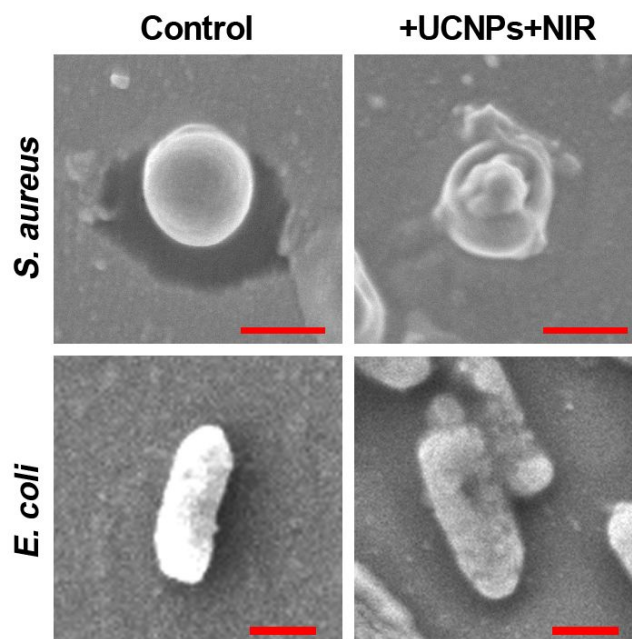

**Figure S6.** SEM images of control group and bacteria (*E. coli* and *S. aureus*) incubated with  $\text{LuVO}_4\text{:Nd}^{3+}/\text{Yb}^{3+}/\text{Er}^{3+}@\text{SiO}_2@\text{Cu}_2\text{S}$  nanoparticles dispersed in PBS solution under 808 nm excitation (scale bar, 500 nm). Both rod-like *E. coli* and spherical *S. aureus* bacterium remained intact and smooth surface in control group, while broken and wrinkled cell membranes with several holes were observed in +UCNPs+NIR group.
